# Supplementary material for: Recent Loss of Self-Incompatibility by Degradation of the Male Component in Allotetraploid Arabidopsis kamchatica
Source: PLoS Genet. 2012 Jul 26;8(7):e1002838. doi: 10.1371/journal.pgen.1002838 (PMC3405996; doi:10.1371/journal.pgen.1002838)
Supplement: Table S5 — Nucleotide divergence of the CHS and WER genes from the two parental species A. halleri and A. lyrata. (XLS) [file pgen.1002838.s010.xls]

## Sheet: Sheet1
Table S5 Nucleotide divergence of CHS and WER genes, from two parental species, A. halleri and A. lyrata.
		Divergence from A. halleri				Divergence from A. lyrata				Divergence from Far East A. lyrata
		Ka	Ks	K		Ka	Ks	K		Ka	Ks	K
CHS-lyr	Cluster 1	0 (0-0)	0.0704 (0.0388-0.102)	0.0144 (0.00785-0.0209)		0.00256 (0-0.00617)	0.0522 (0.0302-0.0742)	0.0123 (0.00764-0.0170)		0 (0-0)	0.000194 (0-0.000557)	0.00115 (0-0.00263)
	Cluster 2	0 (0-0)	0.0704 (0.03874-0.102)	0.0144 (0.00787-0.0209)		0.00256 (0-0.00617)	0.0521 (0.0301-0.0741)	0.0124 (0.00772-0.0171)		0 (0-0)	0.000134 (0.000109-0.000159)	0.0013 (0-0.00296)
	Total	0 (0-0)	0.0704 (0.0374-0.103)	0.0144 (0.00797-0.0209)		0.00256 (0-0.00621)	0.0522 (0.0293-0.0751)	0.0123 (0.00768-0.0170)		0 (0-0)	0.00017 (0-0.000386)	0.00119 (0-0.00270)
CHS-hal	Cluster 1	0.000776 (0-0.00158)	0.00258 (0-0.00644)	0.00178 (0.000328-0.00323)		0.00334 (0-0.00702)	0.0815 (0.0513-0.112)	0.0195 (0.0133-0.0257)		0.000775 (0-0.00159)	0.0709 (0.0390-0.103)	0.0164 (0.00958-0.0232)
	Cluster 2	0 (0-0)	0.00204 (0-0.00494)	0.000533 (0-0.00115)		0.00256 (0-0.00617)	0.0797 (0.0497-0.110)	0.0178 (0.0118-0.0238)		0 (0-0)	0.0691 (0.0373-0.101)	0.0148 (0.00821-0.0214)
	Total	0.00034 (0-0.000693)	0.00228 (0-0.00565)	0.00109 (0.000169-0.00201)		0.0029 (0-0.00658)	0.0805 (0.0498-0.111)	0.0186 (0.0126-0.0245)		0.00034 (0-0.000712)	0.0699 (0.0382-0.102)	0.0155 (0.00875-0.0223)
WER-lyr	Cluster 1	0.00158 (0-0.00464)	0 (0-0)	0.0392 (0.0255-0.0529)		0.00158 (0-0.00464)	0 (0-0)	0.0245 (0.0164-0.0326)		0.00158 (0-0.00466)	0 (0-0)	0.00238 (0-0.00546)
	Cluster 2	0.000195 (0-0.000577)	0 (0-0)	0.0399 (0.0269-0.0529)		0.000195 (0-0.000577)	0 (0-0)	0.0243 (0.0167-0.0319)		0.000195 (0-0.000573)	0 (0-0)	0.00239 (0-0.00562)
	Total	0.0008 (0-0.00217)	0 (0-0)	0.0396 (0.0259-0.0533)		0.0008 (0-0.00217)	0 (0-0)	0.0243 (0.0165-0.0321)		0.0008 (0-0.00215)	0 (0-0)	0.00233 (0-0.00523)
WER-hal	Cluster 1	0 (0-0)	0 (0-0)	0.00263 (0.000991-0.00427)		0 (0-0)	0 (0-0)	0.0365 (0.0261-0.0469)		0 (0-0)	0 (0-0)	0.0397 (0.0271-0.0523)
	Cluster 2	0 (0-0)	0 (0-0)	0.00211 (0.000720-0.00350)		0 (0-0)	0 (0-0)	0.0356 (0.0251-0.0461)		0 (0-0)	0 (0-0)	0.0388 (0.0262-0.0514)
	Total	0 (0-0)	0 (0-0)	0.00235 (0.000998-0.00370)		0 (0-0)	0 (0-0)	0.0360 (0.0253-0.0467)		0 (0-0)	0 (0-0)	0.0392 (0.0264-0.0521)
All estimates were Jukes & Cantor corrected. NA: Corresponding sequences are not reported.
"Divergence from Far East A. lyrata" indicates nucleotide divergence from two A. lyrata accessions from Far East Russia (Shimizu-Inatsugi et al., 2009).
The assignment of clusters is based on InStruct (See Table S9).
