# Supplementary material for: Recent Loss of Self-Incompatibility by Degradation of the Male Component in Allotetraploid Arabidopsis kamchatica
Source: PLoS Genet. 2012 Jul 26;8(7):e1002838. doi: 10.1371/journal.pgen.1002838 (PMC3405996; doi:10.1371/journal.pgen.1002838)
Supplement: Table S6 — Estimated divergence time in years from parental species under two estimates of the mutation rate: Koch et al. [75] and Ossowski et al. [76]. (XLS) [file pgen.1002838.s011.xls]

## Sheet: Sheet1
Table S6. Estimated divergence time in years from parental species under two estimates of the mutation rate, Koch et al. [75] and Ossowski et al. [76].
	Koch et al. (2000)	Ossowski et al. (2010)
CHS-lyr	5667 (0–19280)	167605 (0–421750)
CHS-hal	76000 (0–282560)	153521 (21641–314250)
WER-lyr	0 (0–0)	328169 (0–817313)
WER-hal	0 (0–0)	330986 (127897–578500)
mean	20417 (0–75460)	245070 (37385–532953)
Ninety-five percent confidence intervals (CI) are given in parentheses.
Note that we assumed that the generation time of A. kamchatica, A. lyrata and A. halleri is two years, although some accessions of A. kamchatica are reported to be annual. If we assume that A. kamchatica is annual, mean divergence becomes 183,803 years (confidence interval: 28,039–399,715 years) under the mutation rate given by Ossowski et al. (2010). Generally, divergence time t is given by the …
